# Supplementary material for: Ternary structure of the outer membrane transporter FoxA with resolved signalling domain provides insights into TonB-mediated siderophore uptake
Source: eLife journal article supplement (doi:10.7554/elife.48528), 2019-08-06
Supplement: supp [file elife-48528-supp-v1.zip]

Archive with 9 entries (9 files):
- elife_poa_e48528_Figure_1_figure_supplement_1.pdf
- elife_poa_e48528_Supplementary_file_1.docx
- elife_poa_e48528_Figure_4_figure_supplement_1.pdf
- elife_poa_e48528_Figure_1_figure_supplement_3.pdf
- elife_poa_e48528_Figure_1_figure_supplement_2.pdf
- elife_poa_e48528_Figure_4_figure_supplement_2.pdf
- elife_poa_e48528_Video_1.mpg
- elife_poa_e48528_Figure_3_figure_supplement_1.pdf
- elife_poa_e48528_Transparent_Reporting_File.pdf
