# Supplementary figures and images for: Ternary structure of the outer membrane transporter FoxA with resolved signalling domain provides insights into TonB-mediated siderophore uptake
Source: eLife journal article supplement (doi:10.7554/elife.48528), 2019-08-06

A

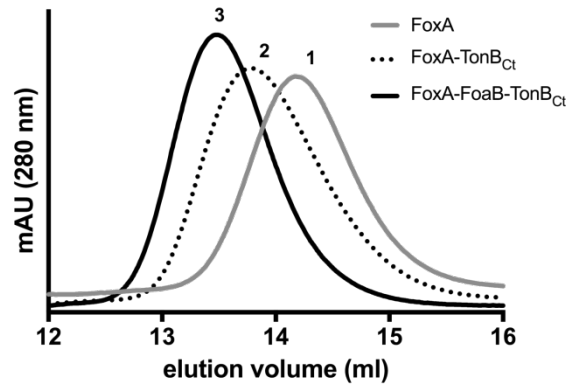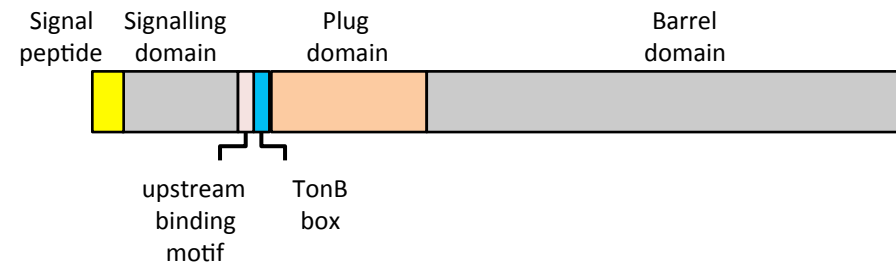

B

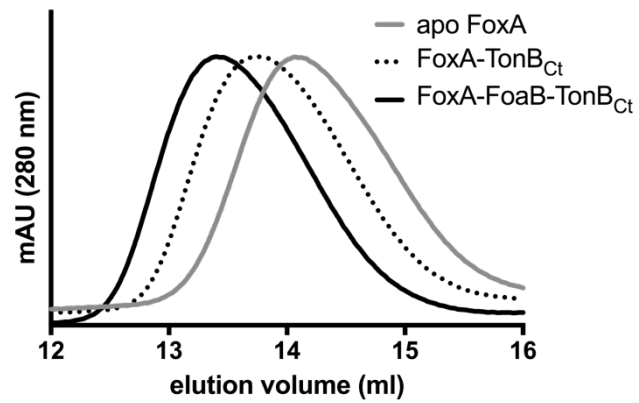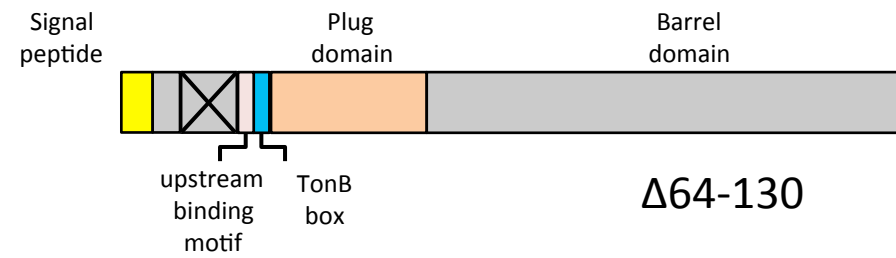

C

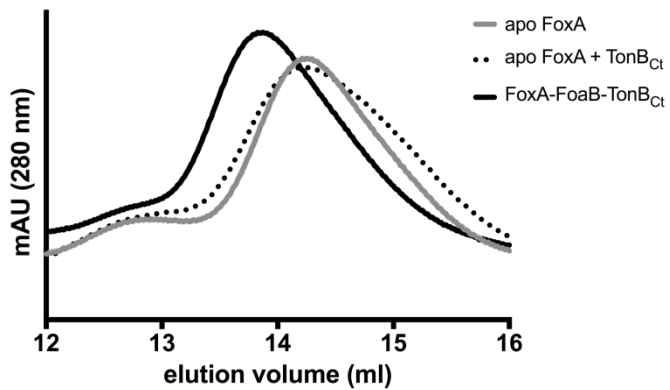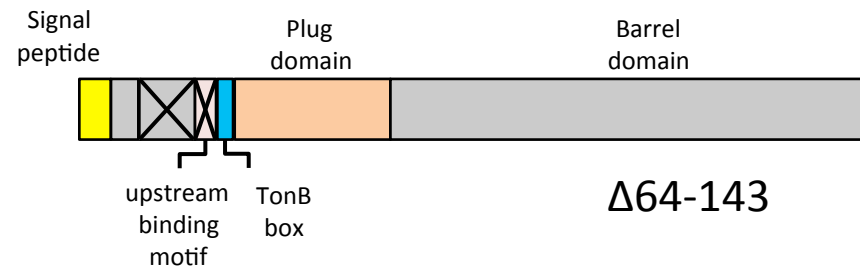

Supplement: supp [file elife-48528-supp-v1.zip]

FhuA-TonB

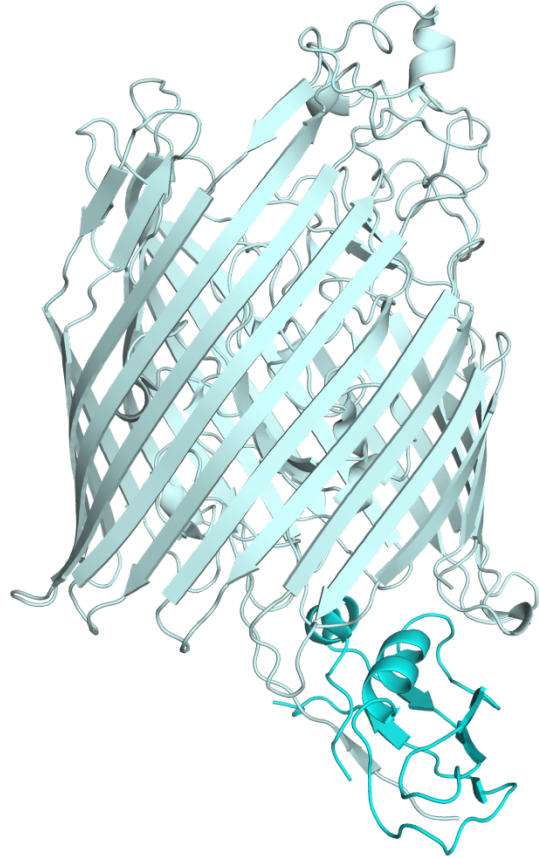

BtuB-TonB

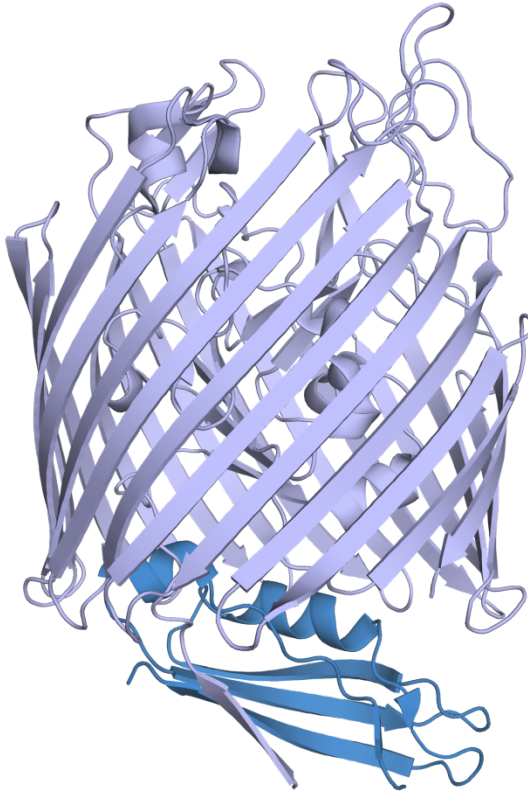

FoxA-TonB

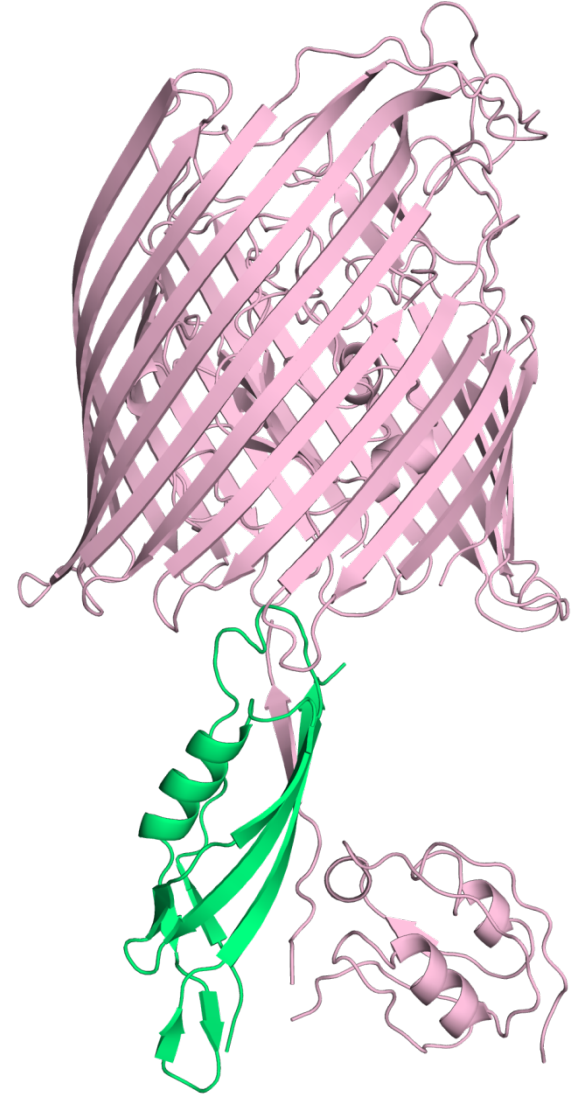

Supplement: supp [file elife-48528-supp-v1.zip]

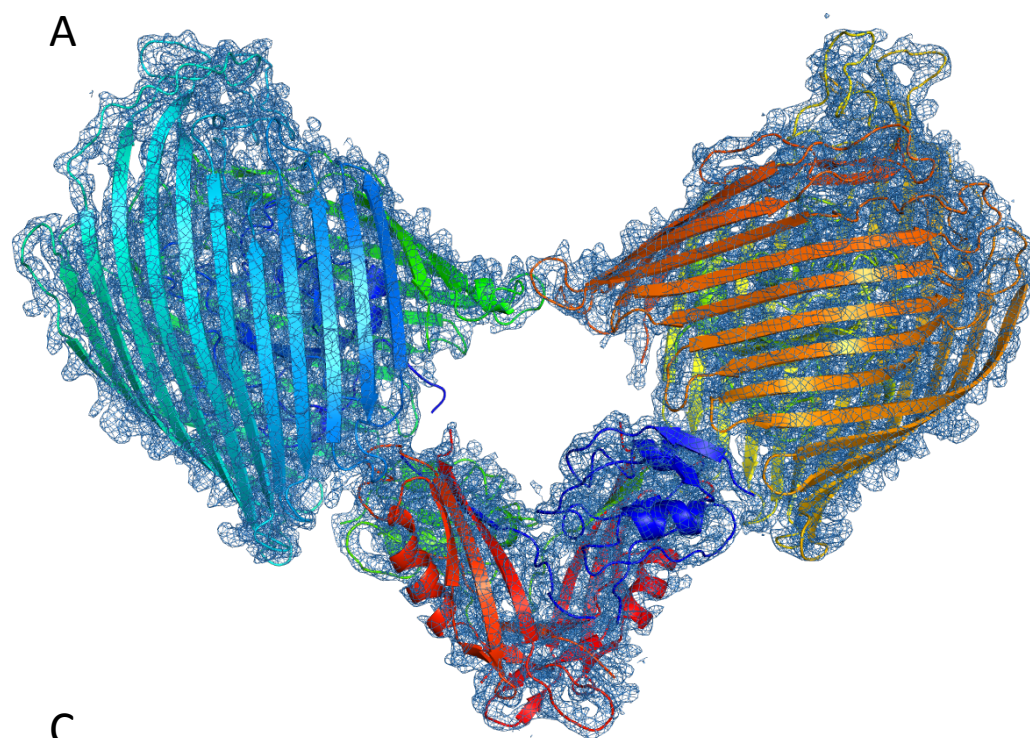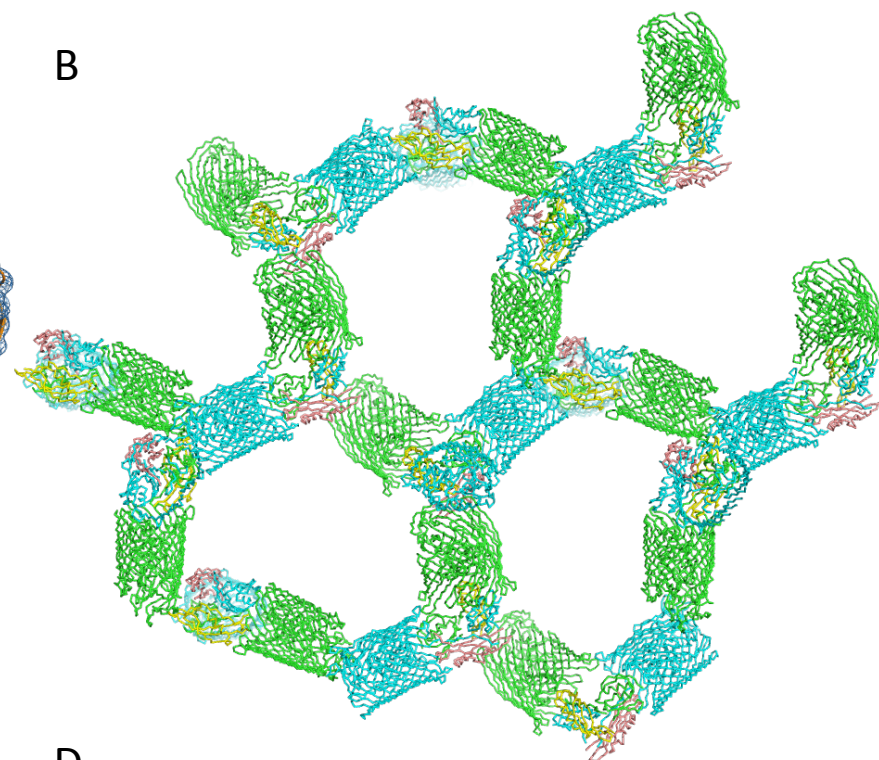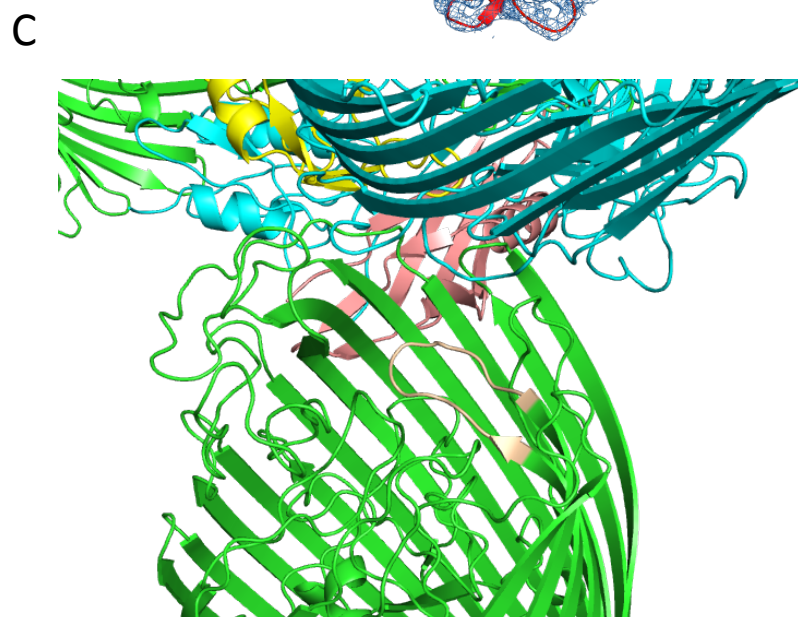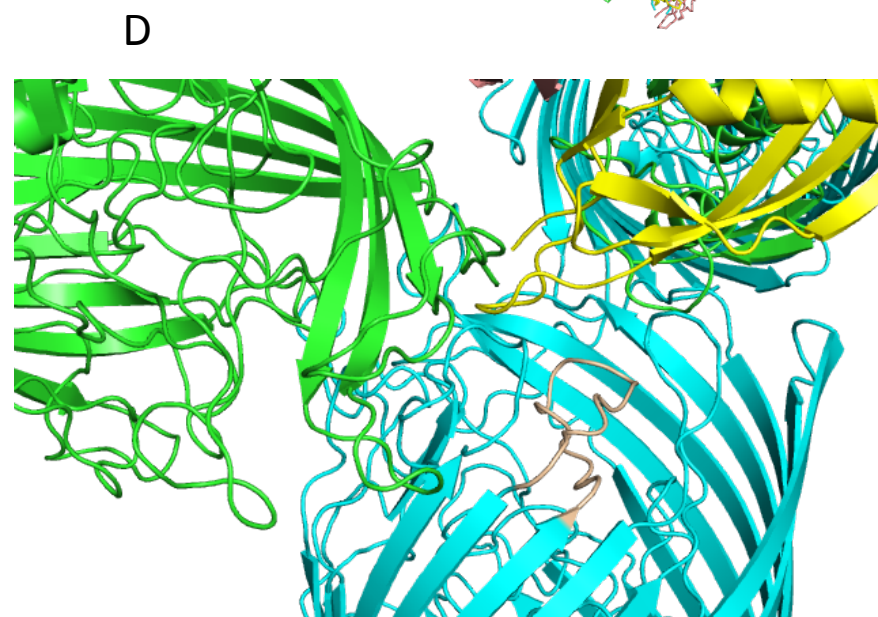

Supplement: supp [file elife-48528-supp-v1.zip › elife_poa_e48528_Figure_1_figure_supplement_1.pdf]

A

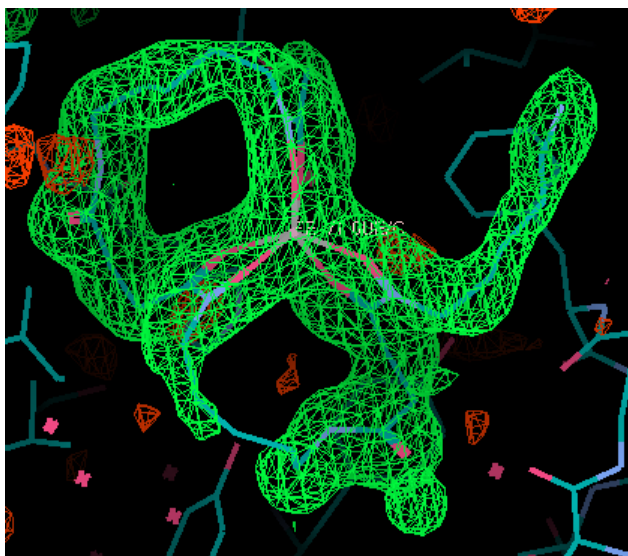

B

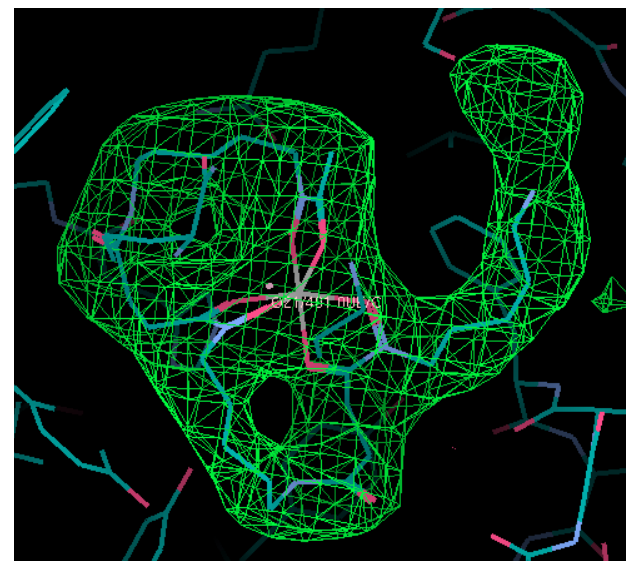

C

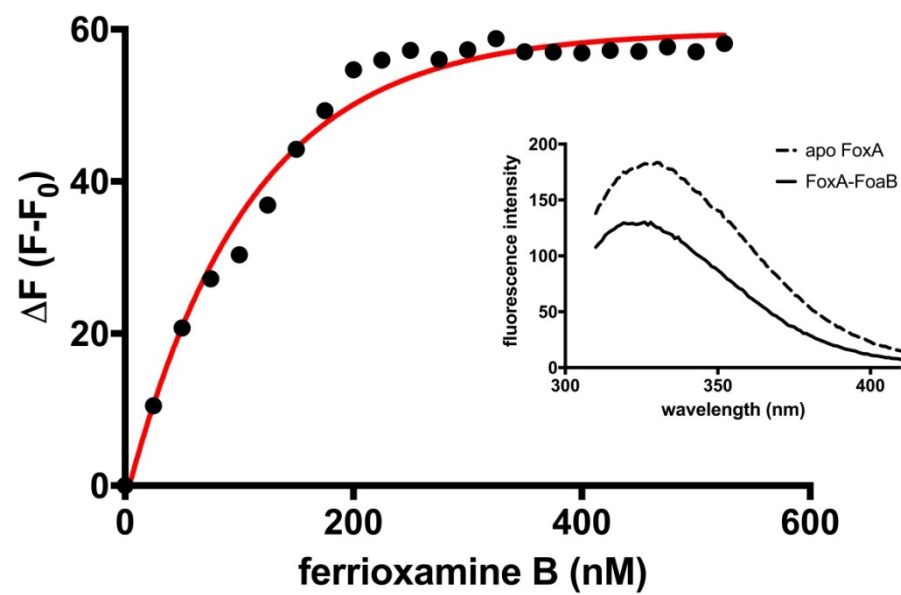

D

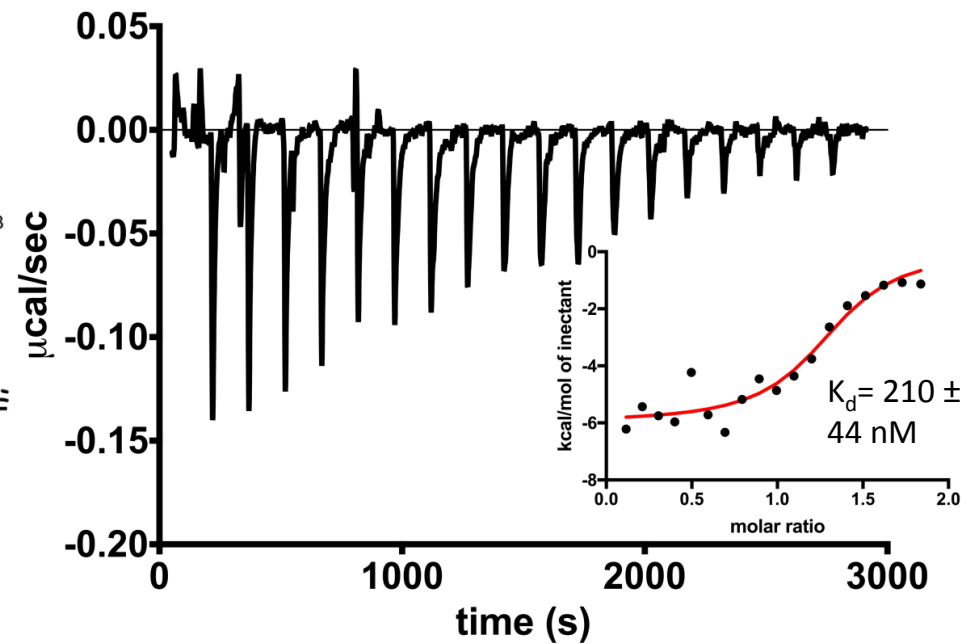

Supplement: supp [file elife-48528-supp-v1.zip › elife_poa_e48528_Figure_4_figure_supplement_1.pdf]

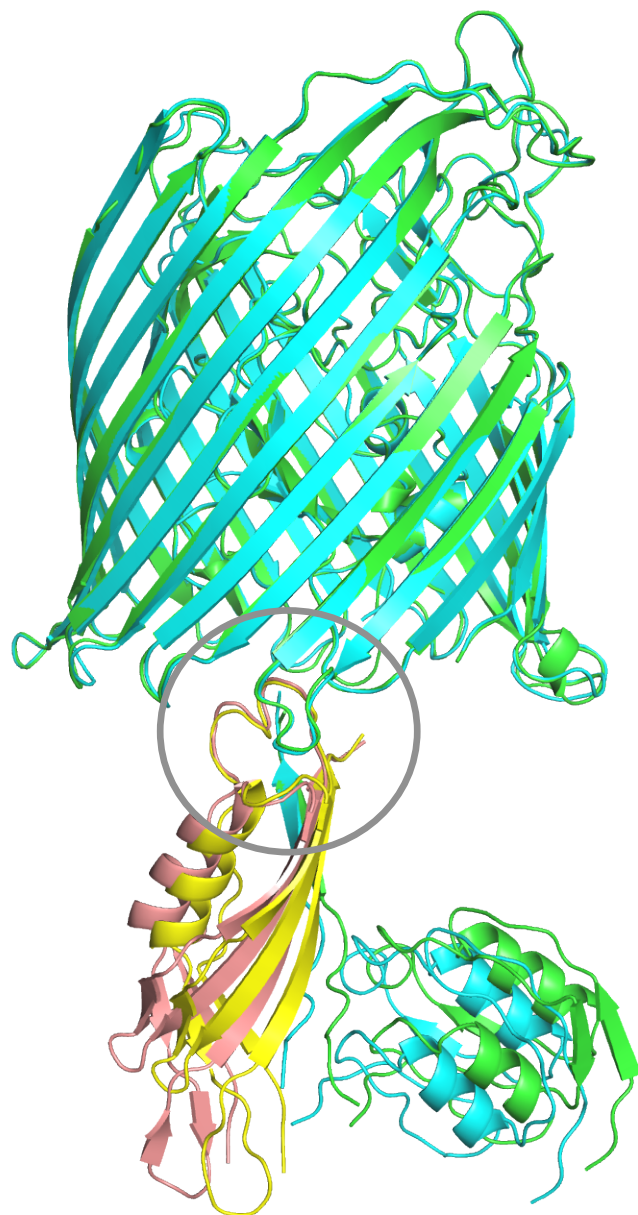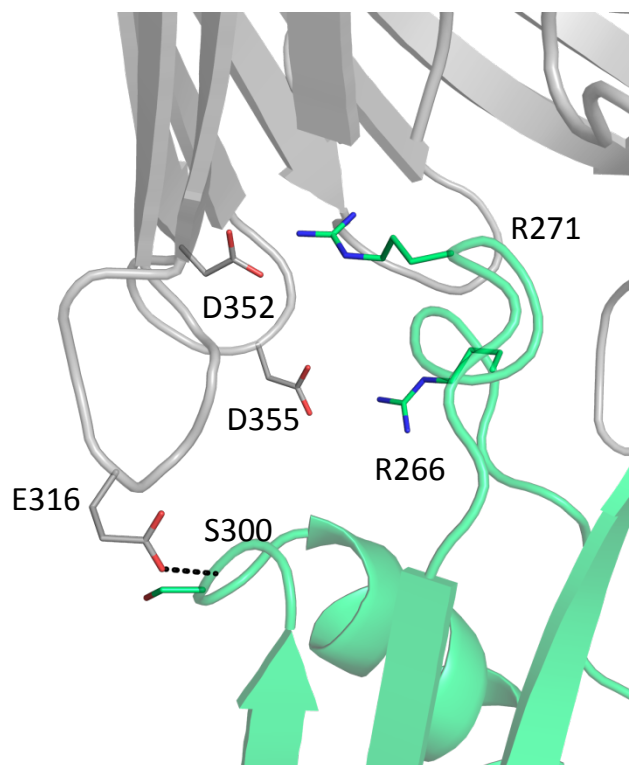

Supplement: supp [file elife-48528-supp-v1.zip › elife_poa_e48528_Figure_1_figure_supplement_2.pdf]

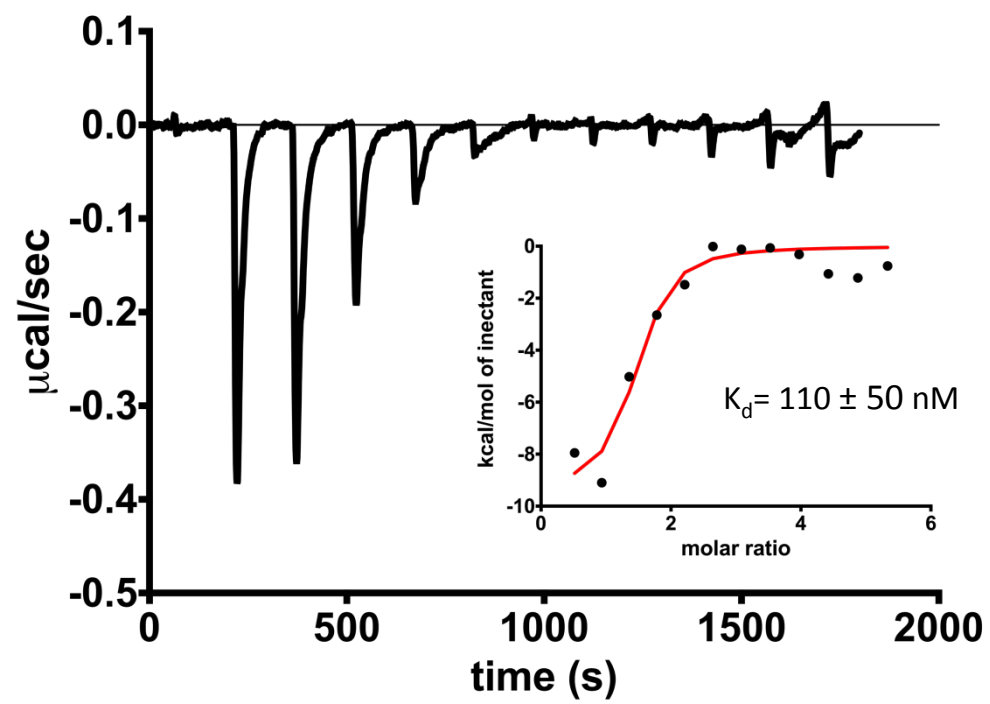

Supplement: supp [file elife-48528-supp-v1.zip › elife_poa_e48528_Figure_4_figure_supplement_2.pdf]
